# Supplementary material for: Sod1 deficiency in mouse oocytes during in vitro maturation increases chromosome segregation errors with a reduced BUBR1 at kinetochore
Source: PubMed Central journal article supplement — Reprod Med Biol. 2025 Jan 22;24(1):e12622. doi: 10.1002/rmb2.12622 (PMC11751902; doi:10.1002/rmb2.12622), 2025-01-22
Supplement: RMB2-24-e12622-s002.pdf [file RMB2-24-e12622-s002.pdf]

# Supplementary table 1

**Supplementary Table 1. List of antibodies used in the immunofluorescent staining and western blot analysis.**

| Primary antibodies      | Manufacturer                | Dilution used |        | Application (size in kDa) |
|-------------------------|-----------------------------|---------------|--------|---------------------------|
|                         |                             | for WB        | for IF |                           |
| Anti-BUBR1              | Abcam (ab28193)             | 1:3000        | 1:200  | WB, IF (130)              |
| Anti-REC8               | Bioss (bs7723R)             | 1:500         |        | WB (60)                   |
| Anti-REC8               | Provided by Prof. Jibak Lee |               | 1:200  | IF                        |
| Anti- $\alpha$ -tubulin | Sigma (T9026)               |               | 1:200  | IF                        |
| Anti-GAPDH              | Sigma (G9545)               | 1:1500        |        | WB (37)                   |

# Supplementary table 2

Supplementary Table 2. Evaluation of the rate PSSC of M I oocytes from WT and *Sod1*KO mice.

|        | WT  | <i>Sod1</i> KO |
|--------|-----|----------------|
| Normal | 593 | 594            |
| PSSC   | 2   | 1              |
