# Supplementary figures and images for: Sod1 deficiency in mouse oocytes during in vitro maturation increases chromosome segregation errors with a reduced BUBR1 at kinetochore
Source: PubMed Central journal article supplement — Reprod Med Biol. 2025 Jan 22;24(1):e12622. doi: 10.1002/rmb2.12622 (PMC11751902; doi:10.1002/rmb2.12622), 2025-01-22

# Supplementary figure 1

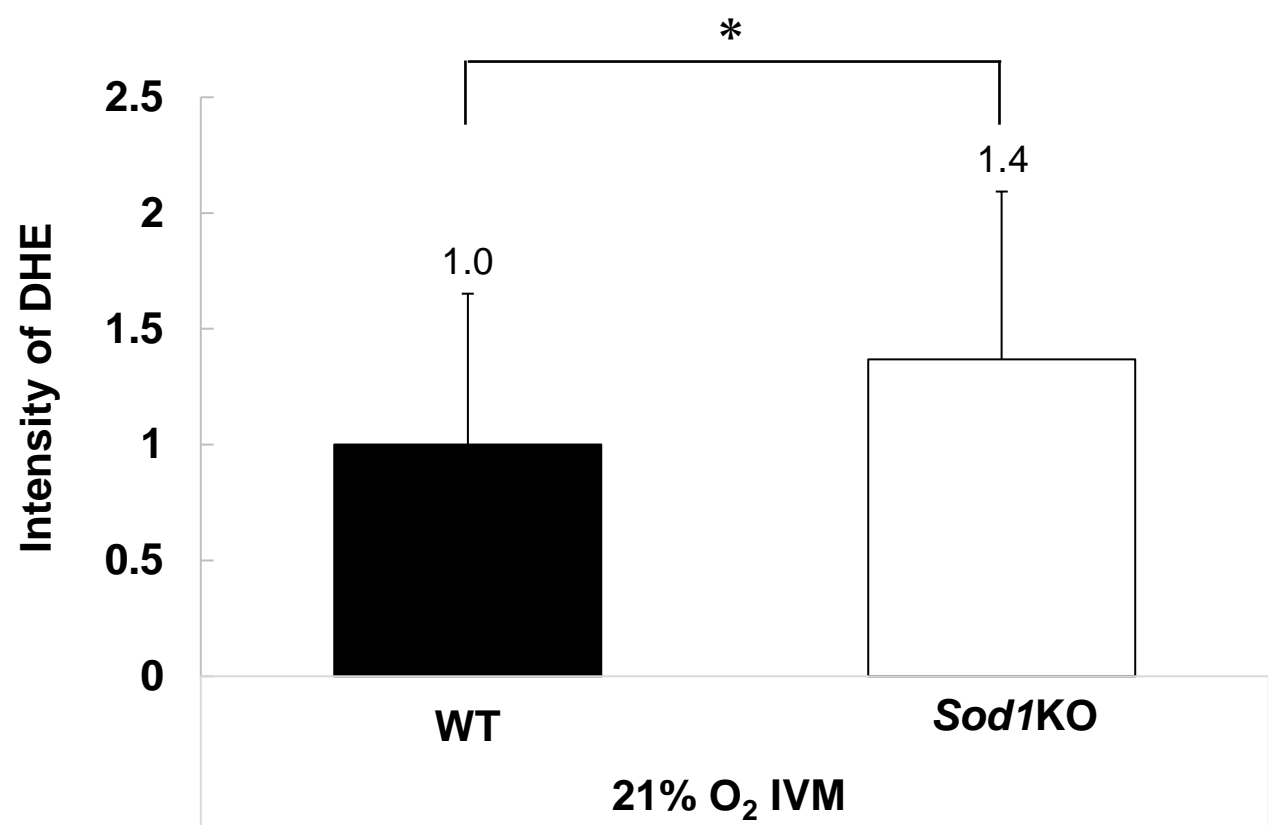

## Supplementary figure 2

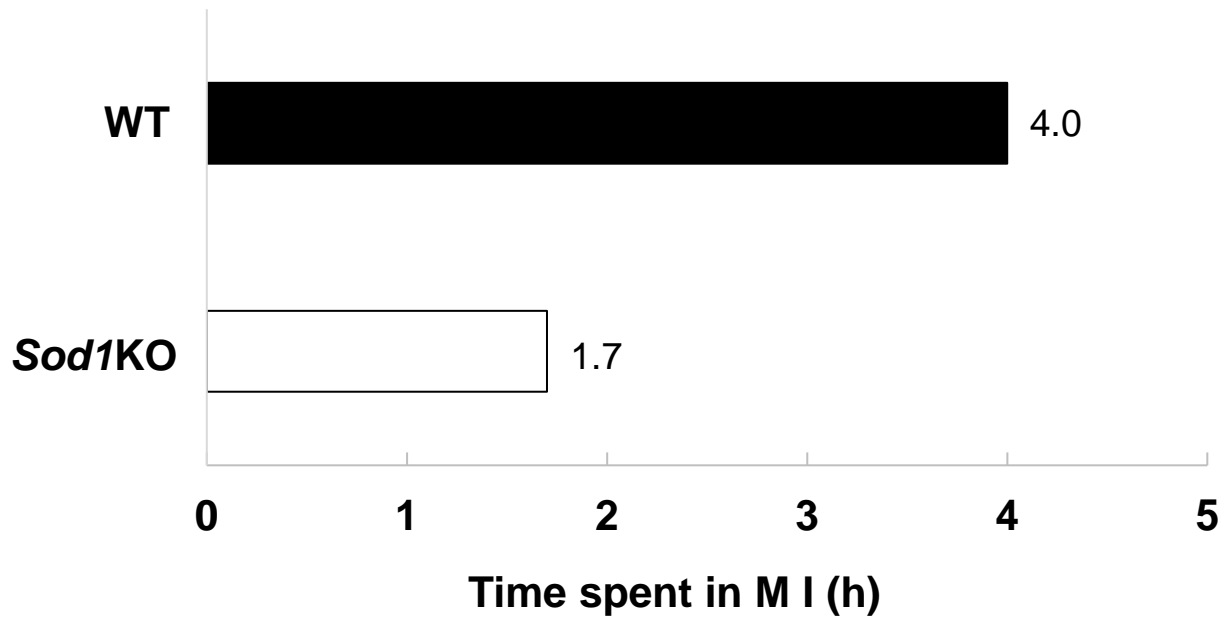

Supplement: RMB2-24-e12622-s001.pdf [file RMB2-24-e12622-s001.pdf]
